# Supplementary material for: Clique of Functional Hubs Orchestrates Population Bursts in Developmentally Regulated Neural Networks
Source: PubMed Central journal article supplement (PMC4177675; doi:10.1371/journal.pcbi.1003823), 2014-09-25
Supplement: pcbi.1003823.s008.pdf [file pcbi.1003823.s008.pdf]

## Text S1: Event driven map

A major advantage for numerical simulations comes from the possibility of transforming the set of differential equations (1), (3) and (4) appearing in the article into an event-driven map [1]. In fact, these differential equations can be formally integrated from time  $t_n$  to time  $t_{n+1}$ , where  $t_n$  is the instant of time immediately after the emission of the  $n$ -th spike in the network, to obtain a discrete time evolution from one spike to the successive one. The resulting map for neuron  $i$  reads

$$V_i(n+1) = V_i(n)e^{-\frac{\tau(n)}{\tau_m}} + I_i^b \left(1 - e^{-\frac{\tau(n)}{\tau_m}}\right) + G_i F_i(n) \quad (1)$$

$$Z_{ij}(n+1) = Z_{ij}(n)e^{-\frac{\tau(n)}{T_{ij}^R}} + \frac{T_{ij}^R}{T_{ij}^R - T_{ij}^I} Y_{ij}(n) \left(e^{-\frac{\tau(n)}{T_{ij}^R}} - e^{-\frac{\tau(n)}{T_{ij}^I}}\right) \quad (2)$$

$$Y_{ij}(n+1) = Y_{ij}(n)e^{-\frac{\tau(n)}{T_{ij}^I}} + u_{ij} \left[1 - \frac{T_{ij}^R}{T_{ij}^R - T_{ij}^I} Y_{ij}(n) \left(e^{-\frac{\tau(n)}{T_{ij}^R}} - \frac{T_{ij}^I}{T_{ij}^R} e^{-\frac{\tau(n)}{T_{ij}^I}}\right) - Z_{ij}(n)e^{-\frac{\tau(n)}{T_{ij}^R}}\right] \delta_{i,s}, \quad (3)$$

where the index  $s$  refers to the neuron spiking at time  $t_{n+1}$ ,  $\tau(n) = t_{n+1} - t_n$  is the  $n$ -th inter-spike-interval (ISI) in the network and  $F_i(n)$  has the following expression,

$$F_i(n) = \frac{1}{K_i^I} \sum_{j \neq i} \epsilon_{ij} Y_{ij}(n) \frac{T_{ij}^I}{T_{ij}^I - 1} \left(e^{-\frac{\tau(n)}{T_{ij}^I}} - e^{-\frac{\tau(n)}{\tau_m}}\right), \quad (4)$$

with the sum running over the index  $j$ , which denotes all direct connections (afferent synapses) reaching neuron  $i$  from all the other neurons. Notice that  $\tau(n)$  can be determined by computing the time

$$\tau_i(n) = \ln \left[ \frac{I_i^b - V_i(n)}{I_i^b + G_i F_i(n) - 1} \right], \quad i = 1, \dots, N; \quad (5)$$

needed to each neuron  $i$ th neuron to reach the threshold value and by selecting the shortest one, namely

$$\tau(n) = \inf_i \{\tau_i(n) | i = 1, 2, \dots, N\}.$$

## References

1. Zillmer R, Livi R, Politi A, Torcini A (2007) Stability of the splay state in pulse-coupled networks. Phys Rev E 76: 046102.
